# Supplementary material for: The oesophageal string test: a novel, minimally invasive method measures mucosal inflammation in eosinophilic oesophagitis
Source: HighWire-hosted journal article supplement (doi:10.1136/gutjnl-2012-303171), 2012-08-15

## Supplemental Figure S2 – Furuta et al

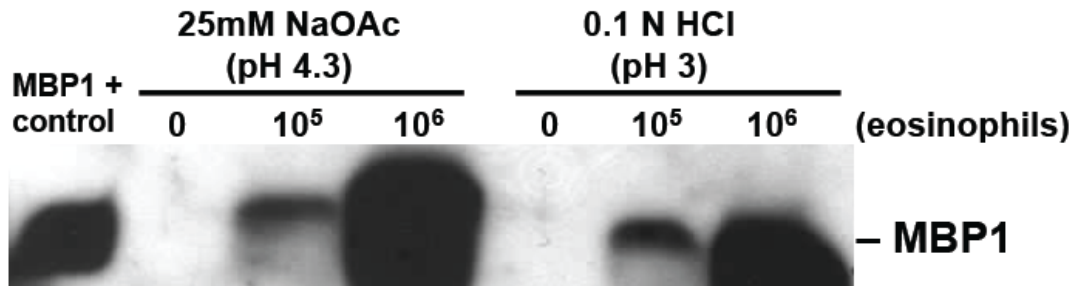

Supplement: gutjnl-2012-303171supp_figure2.pdf [file gutjnl-2012-303171supp_figure2.pdf]
