# Supplementary material for: The oesophageal string test: a novel, minimally invasive method measures mucosal inflammation in eosinophilic oesophagitis
Source: HighWire-hosted journal article supplement (doi:10.1136/gutjnl-2012-303171), 2012-08-15

### ROC curves for Biopsies

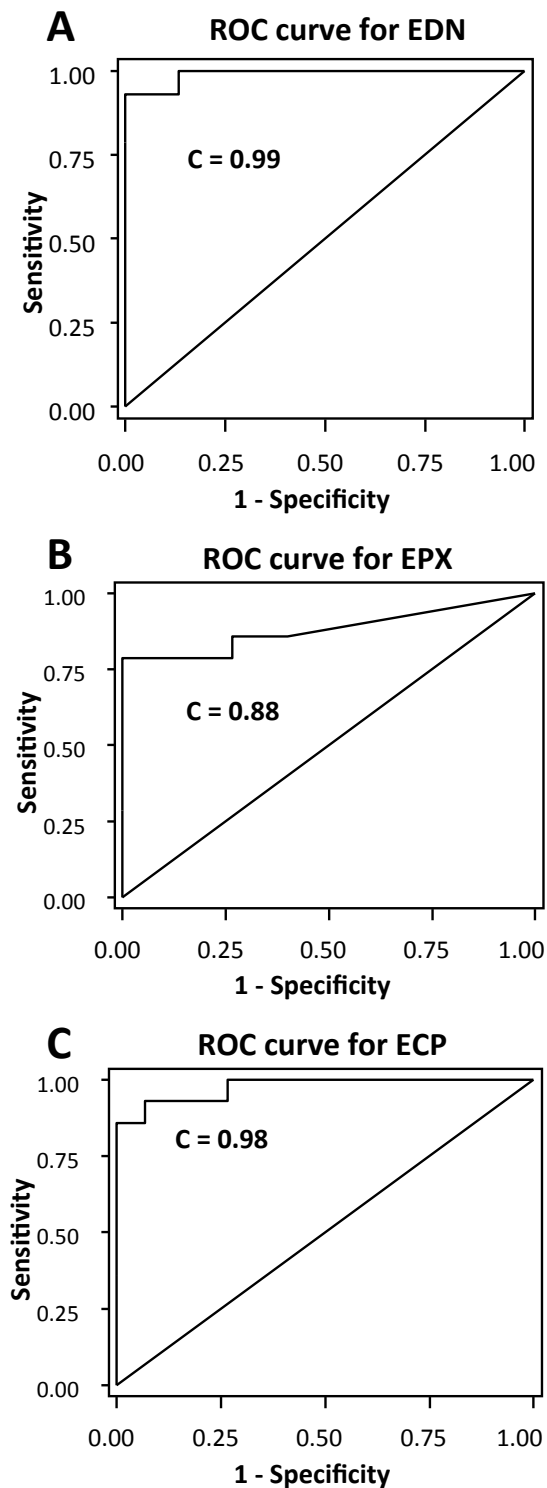

### ROC curves for EST

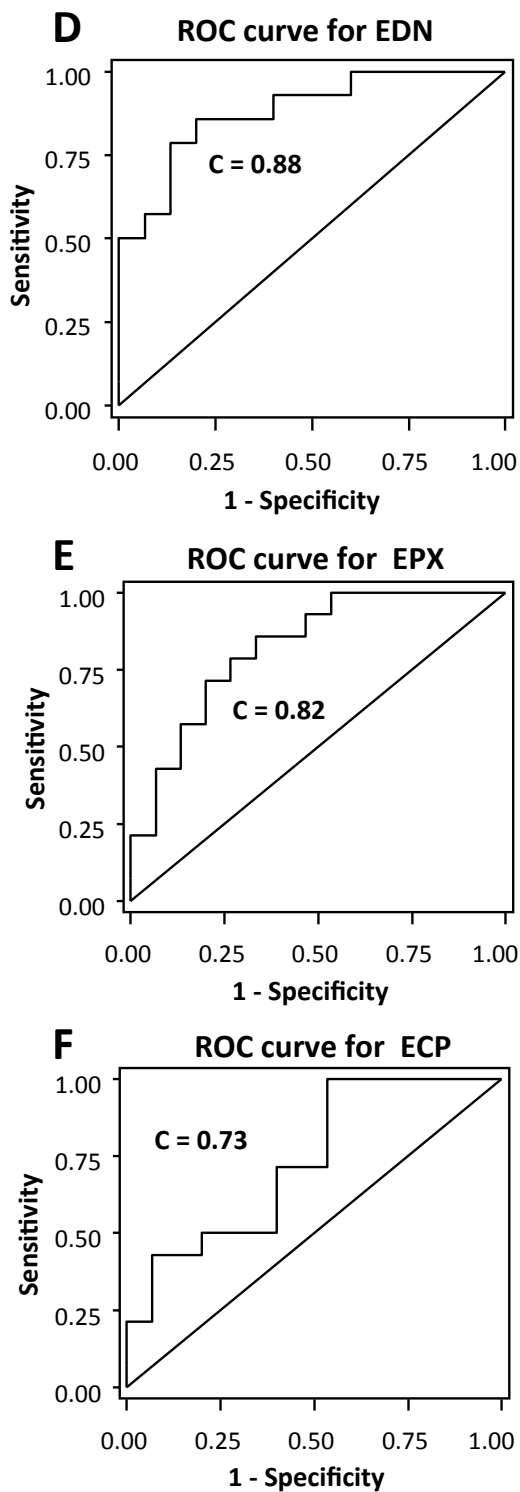

Supplement: gutjnl-2012-303171supp_figure6.pdf [file gutjnl-2012-303171supp_figure6.pdf]
