# Supplementary material for: The oesophageal string test: a novel, minimally invasive method measures mucosal inflammation in eosinophilic oesophagitis
Source: HighWire-hosted journal article supplement (doi:10.1136/gutjnl-2012-303171), 2012-08-15
Supplement: gutjnl-2012-303171supp_table.pdf [file gutjnl-2012-303171supp_table.pdf]

**Supplemental Table S1 - Subject Characterization**

|                                           | <b>Eosinophilic oesophagitis–active (untreated)</b> | <b>Eosinophilic oesophagitis–remission (treated)</b> | <b>Gastrooesophageal reflux disease</b> | <b>Normal oesophagus</b> |
|-------------------------------------------|-----------------------------------------------------|------------------------------------------------------|-----------------------------------------|--------------------------|
| <b>Number of Subjects</b>                 | 14                                                  | 8                                                    | 4                                       | 15                       |
| <b>Age Average years (range in years)</b> | 16.1 (7-20)                                         | 15.0 (12-18)                                         | 13.3 (12-17)                            | 14.5 (11-18)             |
| <b>Male gender (% of total)</b>           | 13 (93%)                                            | 6 (75%)                                              | 2 (50%)                                 | 4 (27%)                  |
